# Supplementary material for: Differential Susceptibility and Innate Immune Response of Aedes aegypti and Aedes albopictus to the Haitian Strain of the Mayaro Virus
Source: PubMed Central journal article supplement (PMC6832402; doi:10.3390/v11100924), 2019-10-09
Supplement: viruses-11-00924-s001.pdf [file viruses-11-00924-s001.pdf]

| Name    | Mosquito              | Sequence (5' -3' )                            | Name   | Mosquito              | Sequence (5' -3' )                            |
|---------|-----------------------|-----------------------------------------------|--------|-----------------------|-----------------------------------------------|
| CECE    | <i>Ae. aegypti</i>    | GTGATTCCCGGTCGTCTTTG<br>GTGAGCAAAACCAACCCGAT  | ML26A  | <i>Ae. aegypti</i>    | GCTACTTCAAAACGGGCGAA<br>GTCTTCAAGCACCTTTCGCA  |
|         | <i>Ae. albopictus</i> | TACCTCCGCAGCTCCTATTG<br>GGGTTGCCTCGTGTGTTAAG  |        | <i>Ae. albopictus</i> | CTGGTAATGGTTGGTGCGAG<br>TGTTGTTGCCTTGTGACAG   |
| CLIPB27 | <i>Ae. aegypti</i>    | AAATACGGAGGCGCAACATC<br>CATTTCCAGAACACCGCCA   | NPC1   | <i>Ae. aegypti</i>    | CAGCTACGTGGTCATGTTCG<br>GGTCGTAGCCAGCTGTAGAT  |
|         | <i>Ae. albopictus</i> | CGCTTTAGGGATGTTTCGGG<br>CTGAAGCGCCTCTGAAATCC  |        | <i>Ae. albopictus</i> | TGAATATCTTGCAGTGCCGGC<br>CCATCAGGCTATCGAGTGGT |
| CLIPB31 | <i>Ae. aegypti</i>    | GTCTGCTTGGCTGTGTATC<br>TGTTGCGCCTCTTCTCCTAA   | PGRPS4 | <i>Ae. aegypti</i>    | TCCTACTACGGACTCCAGCT<br>GACAGCAGCGAACTTGTTC   |
|         | <i>Ae. albopictus</i> | CGGTGGCTTTGGATTCGAT<br>CCATTACCCAAGCGAAGAG    |        | <i>Ae. albopictus</i> | TCCAGGATTCAACGATCGCT<br>ATTTGGGTTGAAACGAGGCC  |
| CTLMA14 | <i>Ae. aegypti</i>    | GGTATTGGATCGGTGGCAAC<br>AGTATCCGCGCGAAGTTCTA  | PPO3   | <i>Ae. aegypti</i>    | GCTAAGAAAGATCGCCGTGG<br>AGGGTAGGCACGATTGTTC   |
|         | <i>Ae. albopictus</i> | CGTGGGGAAAAGGAACACTG<br>AACGATGTTCCATGCGAGTG  |        | <i>Ae. albopictus</i> | AGATGTTACGACGGCAATGC<br>CCCAGCAGCCAAATCAACTT  |
| DEFA    | <i>Ae. aegypti</i>    | CGCCCTTTTGCAAACCTCTCT<br>ACAAGCACTATCACCAACGC | Rel1a  | <i>Ae. aegypti</i>    | ACCTCAGCAACCTGGGCAT<br>GAGATCGATGGTGGCAGGCT   |
|         | <i>Ae. albopictus</i> | TGACCGCCGTAATCATCGTA<br>TGTGGGTAAGCACTGGTGAT  |        | <i>Ae. albopictus</i> | CGATCGTGACGGAGCAAATT<br>TCCAGCAGTTCGTTACAGAT  |
| FREP16  | <i>Ae. aegypti</i>    | TTGAAAAGTGCGCAGAGGTC<br>TTATCACTGCACAGAACGCG  | Rel2   | <i>Ae. aegypti</i>    | TACGAGCTCCTTCAACATGC<br>AGGTCTGCAGTTGACCCTCT  |
|         | <i>Ae. albopictus</i> | CCACCAGTACTAGCGAACCA<br>CTGCTGAATCTCCCATGCAC  |        | <i>Ae. albopictus</i> | GTTGCGCCATAGTGTACCAG<br>GAAGAAGACCGCCGAATGTC  |
| DEFE    | <i>Ae. aegypti</i>    | TCTAGCTCAACCACCTTGCA<br>ATCGGTGTCAAATTCTGCGG  | TEP22  | <i>Ae. aegypti</i>    | GCGGGACTGATTGTACCTTT<br>GAGGATATCGCCTGGTTTGT  |
|         | <i>Ae. albopictus</i> | CATTGGTTTCCCTCTACGCG<br>ATTCCAGCCAAGTCCACTCA  |        | <i>Ae. albopictus</i> | GACAACCAACGGAGCATT<br>CGTGAGGGCAAAGGAAGATG    |
| FREP10  | <i>Ae. aegypti</i>    | TTCCTCAGGATTGGGTCGAC<br>GGCGTGATCATGATTGGCTT  | TRAF6  | <i>Ae. aegypti</i>    | CACAAACACGTCGGAACACT<br>TCGTCATATGCAGCGCTCTA  |
|         | <i>Ae. albopictus</i> | TCTGGATAGGACTCGAACGC<br>ATGAATCCCCTGCAGTTCCA  |        | <i>Ae. albopictus</i> | TTGCTTGCATCCATACTGC<br>CTGCGGAACACATGTAGAGC   |
| FREP37  | <i>Ae. aegypti</i>    | GGTAGTGTGCTGGAGGACT<br>ACCTTGAGTGACATGCCGTA   | Vir-1  | <i>Ae. aegypti</i>    | GCCAAAGTCCGGTATTCTTC<br>TTCACGAGATCGTCAAGGTAA |
|         | <i>Ae. albopictus</i> | TTTGCAATTTGGACGGAGG<br>ACGAATCTTCAGCAGGTCCA   |        | <i>Ae. albopictus</i> | TGGCCCATCTTGATGAGTT<br>CGAGCACCTGAATGACGAAG   |

|        |                       |                                              |       |                       |                                                |
|--------|-----------------------|----------------------------------------------|-------|-----------------------|------------------------------------------------|
| LRIM16 | <i>Ae. aegypti</i>    | GCCGATGATTTTGCTGAGCT<br>AGTGATGGCAGTTTCCTCCA | Actin | <i>Ae. aegypti</i>    | GAACACCCAGTCCTGCTGACA<br>TGGTCATCTTCTCACGGTTAG |
|        | <i>Ae. albopictus</i> | TTCGCGGAACACCTTTCTTG<br>CGATTCTTGCGCCATTGTA  |       | <i>Ae. albopictus</i> | ACGCGAAAAGTCCAAAACGA<br>CGCGGCTATCCAAAATCCAA   |
| LYSC7  | <i>Ae. aegypti</i>    | TCTCCTTTTGCGGCTGAAAC<br>GAATTCGCCCCGTACAAGTC | LYSC7 | <i>Ae. albopictus</i> | TGGCAGTAACTTGACCCGAT<br>CACTGCAATGACTCTCTCGC   |
